# Supplementary material for: Accuracy improvement on quantitative analysis of the total iron content in branded iron ores by laser-induced breakdown spectroscopy combined with the double back propagation artificial neural network
Source: Royal Society of Chemistry journal article supplement (doi:10.1039/d1ay01881g), 2021-12-16
Supplement: d1ay01881g1.pdf [file d1ay01881g1.pdf]

## Accuracy improvement on quantitative analysis of the total iron content in branded iron ores by laser-induced breakdown spectroscopy combined with double back propagation artificial neural network

Piao Su,<sup>a,b</sup> Shu Liu,<sup>\*b</sup> Hong Min,<sup>b</sup> Yarui An,<sup>\*a</sup> Chenglin Yan,<sup>b</sup> and Chen Li<sup>b</sup>

<sup>a</sup>Institute of Bismuth Science, University of Shanghai for Science and Technology, Shanghai 200093, China. Email: [anyarui@usst.edu.cn](mailto:anyarui@usst.edu.cn)

<sup>b</sup>Technical Center for Industrial Product and Raw Material Inspection and Testing of Shanghai Customs, Shanghai 200135, China. Email: [liu\\_shu@customs.gov.cn](mailto:liu_shu@customs.gov.cn)

Table S1 The element content range (wt%) of different types of branded iron ores

| Brand  | SiO <sub>2</sub> | Al <sub>2</sub> O <sub>3</sub> | CaO         | MgO         |
|--------|------------------|--------------------------------|-------------|-------------|
| FMG    | 4.880-6.190      | 2.560-2.780                    | 0.041-0.171 | 0.057-0.116 |
| MAC    | 2.540-5.460      | 2.140-2.540                    | 0.009-0.054 | 0.073-0.149 |
| PB     | 3.220-4.110      | 2.120-2.850                    | 0.001-0.196 | 0.067-0.162 |
| Newman | 3.043-4.240      | 1.228-1.660                    | 0.001-0.137 | 0.041-0.131 |
